# Supplementary material for: Profiling of Epigenetic Features in Clinical Samples Reveals Novel Widespread Changes in Cancer
Source: MDPI journal article supplement (doi:10.3390/cancers11050723), 2019-05-24

# Acetyltransferases

## CLOCK

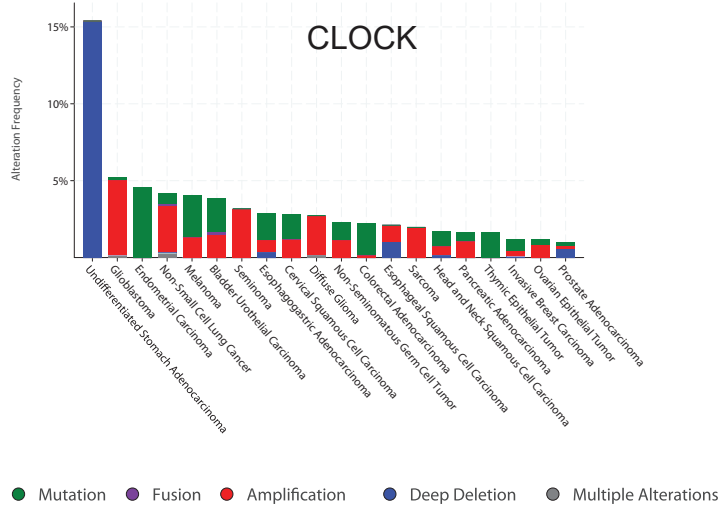

## CREBBP

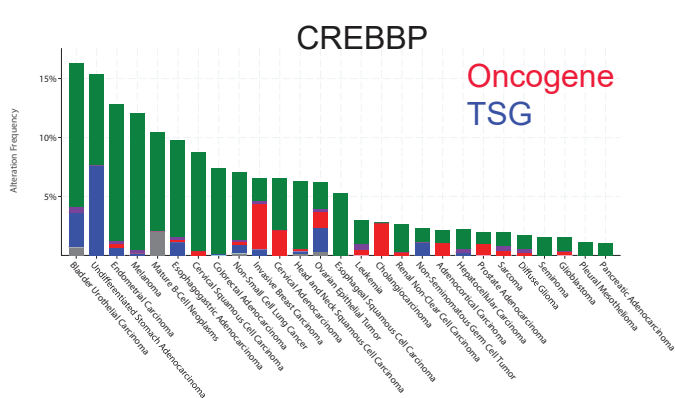

## ELP3

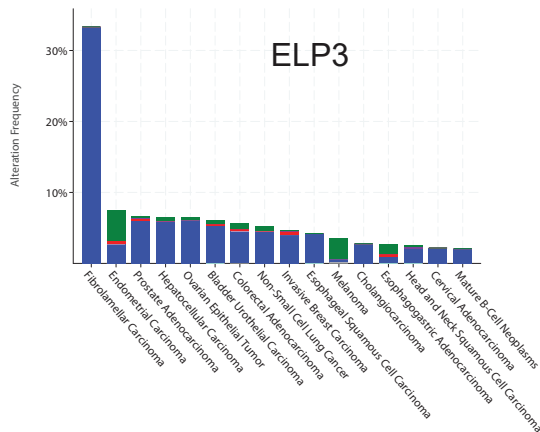

## EP300

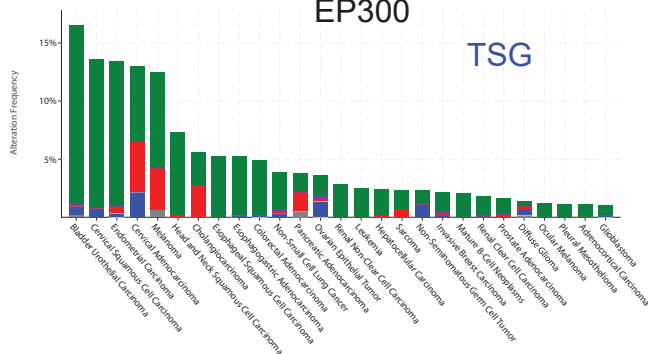

## GTF3C4

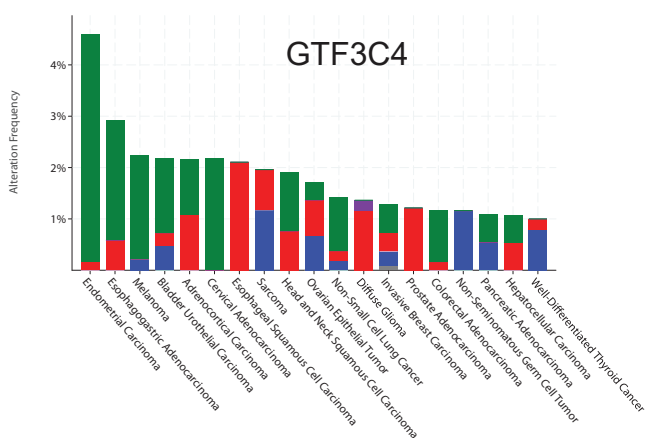

## HAT1

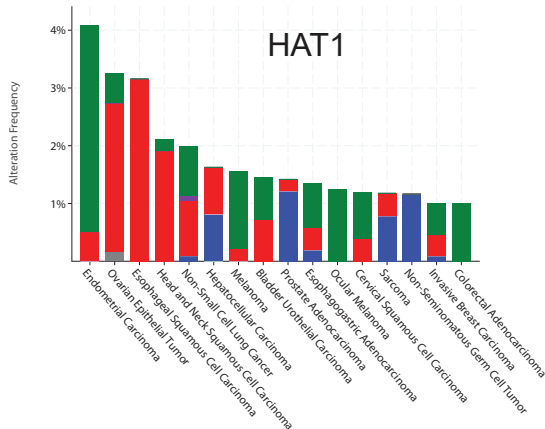

# Acetyltransferases

KAT2A

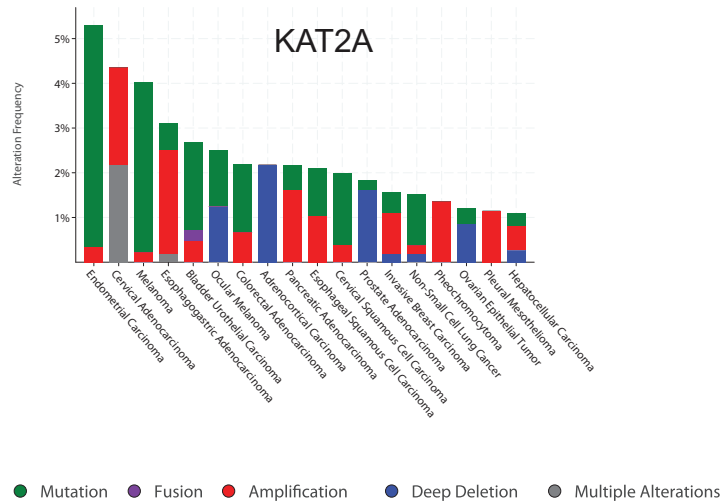

KAT2B

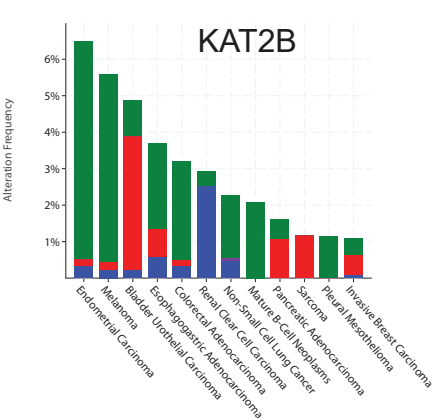

KAT5

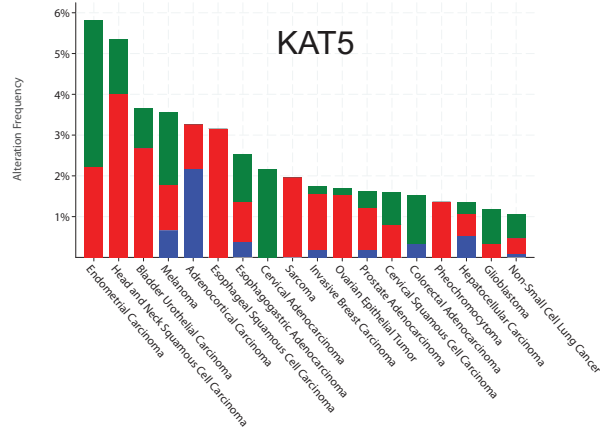

KAT6A

Oncogene

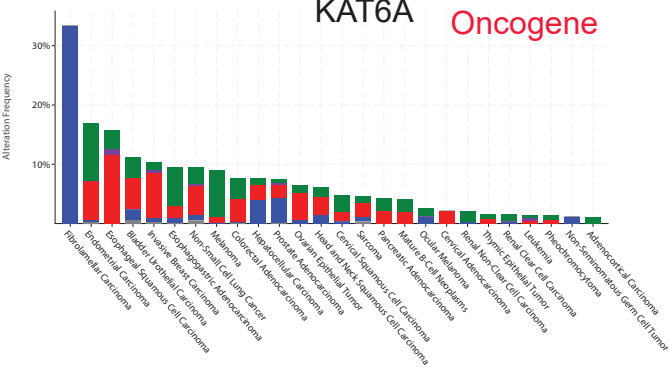

KAT6B

TSG

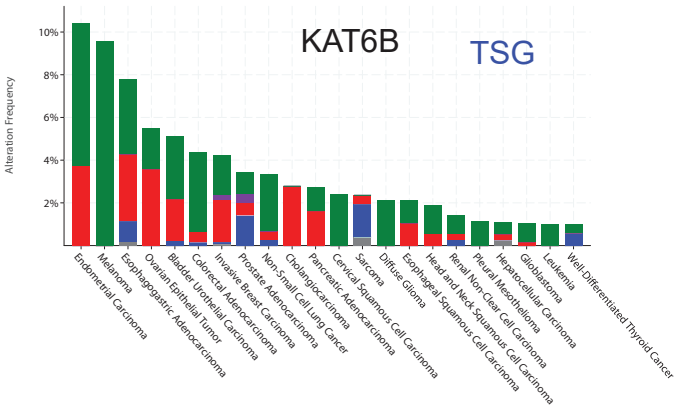

KAT7

Oncogene

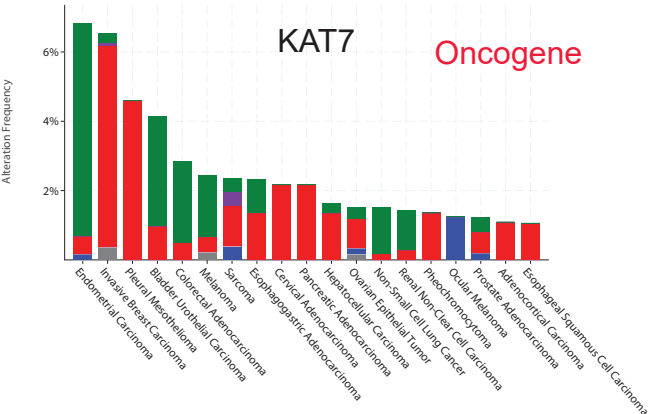

# Acetyltransferases

KAT8

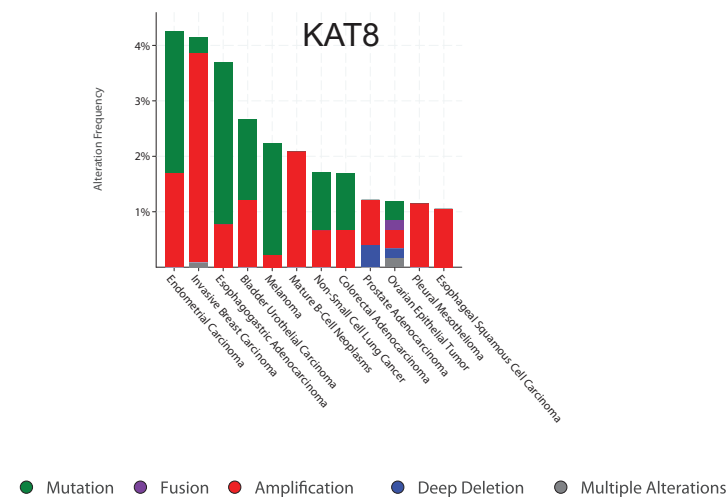

NCOA1

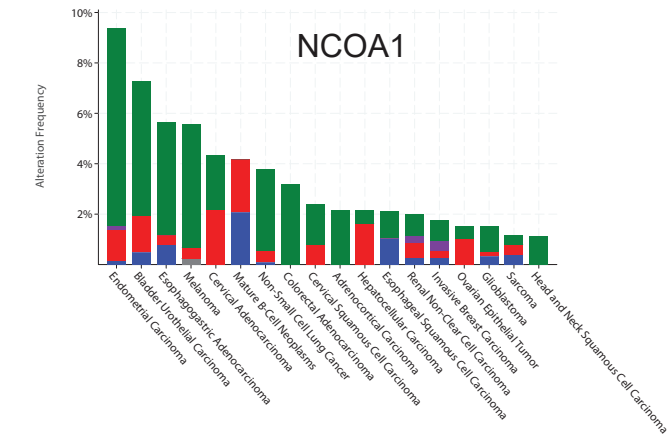

NCOA2

Oncogene

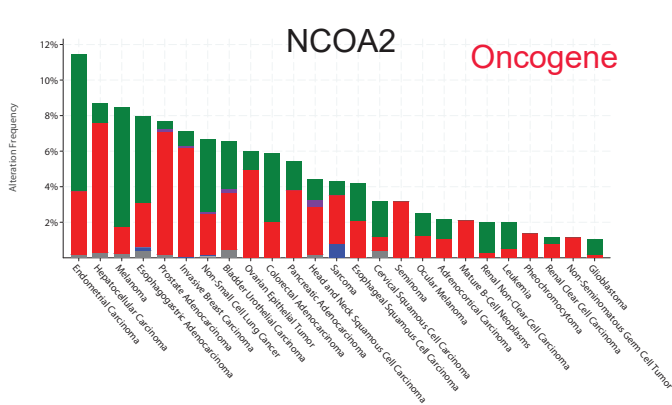

NCOA3

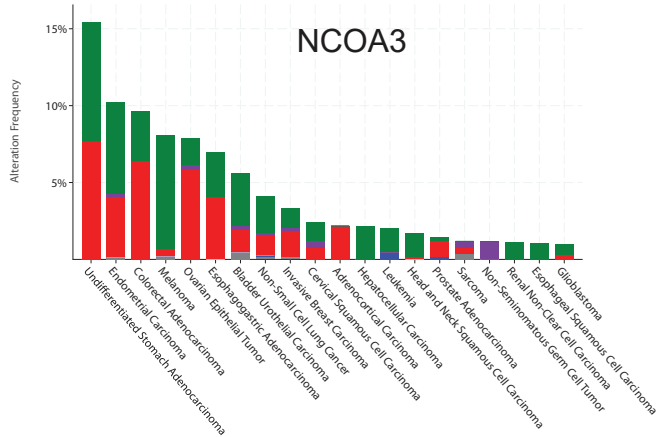

TAF1

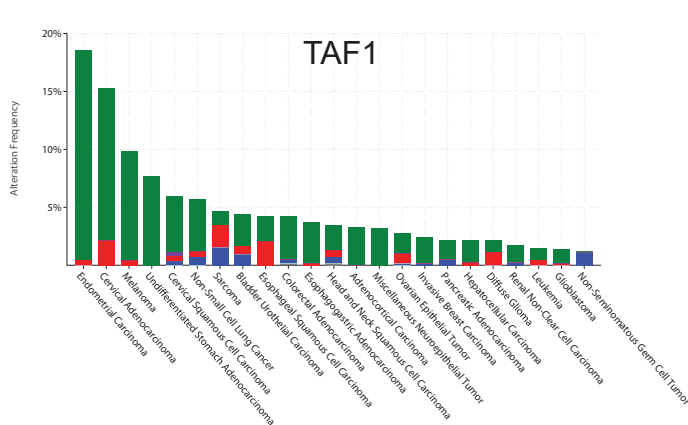

# Deacetylases

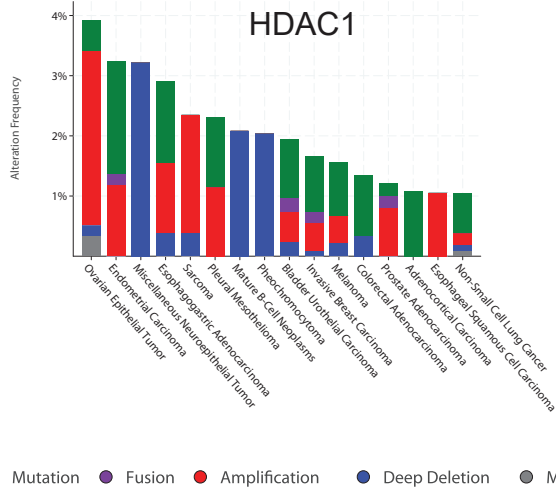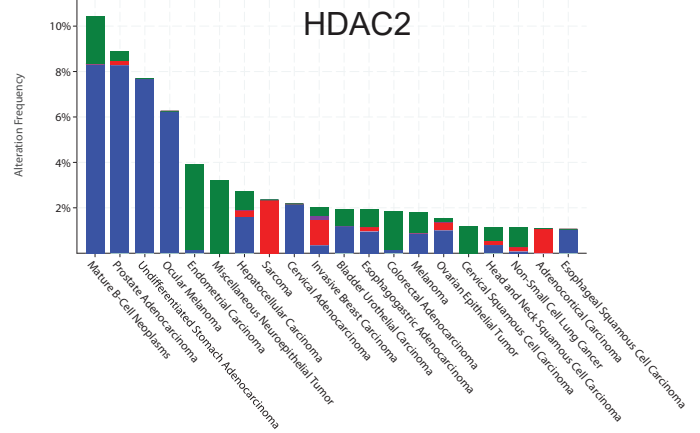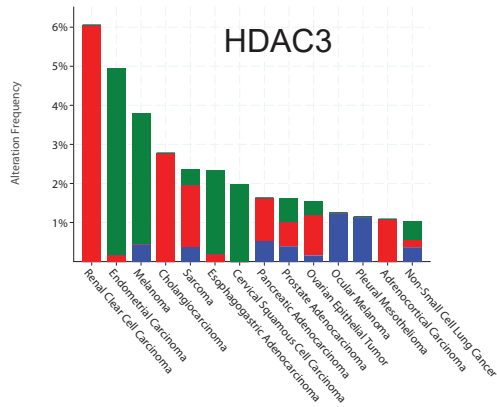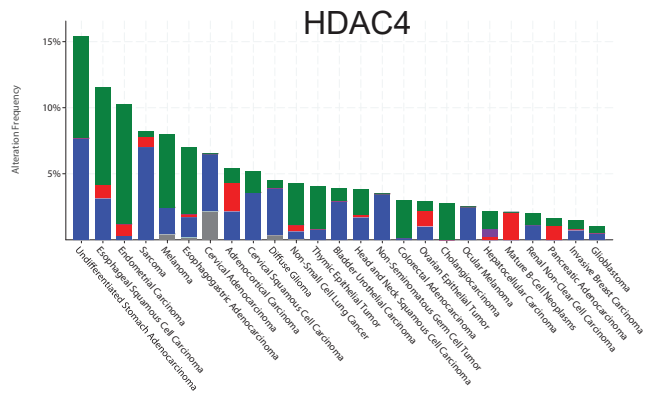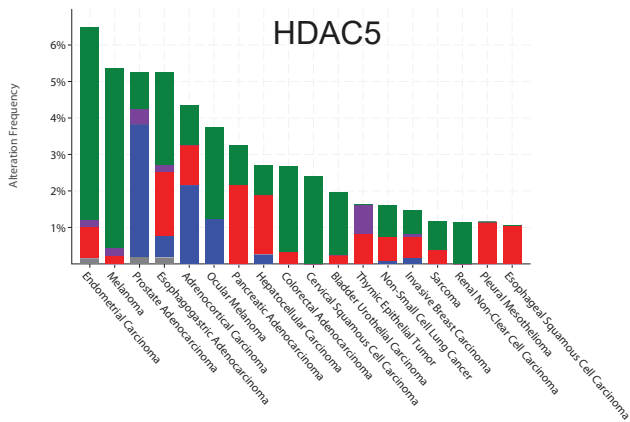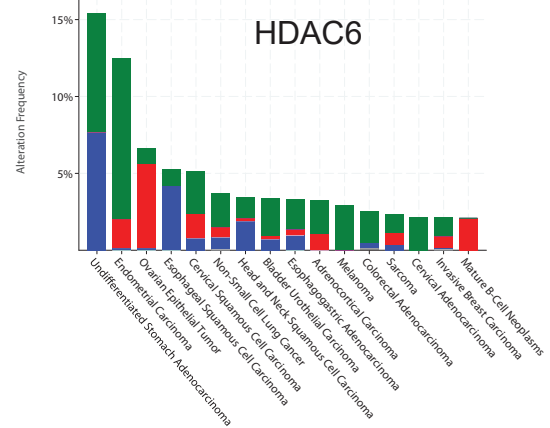

# Deacetylases

HDAC10

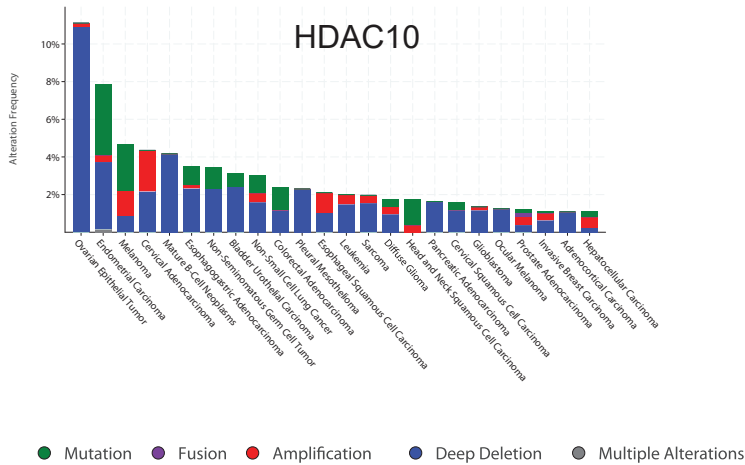

HDAC11

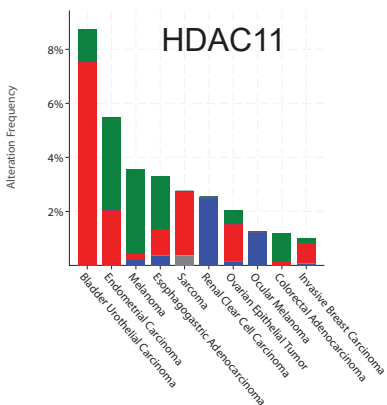

HDAC7

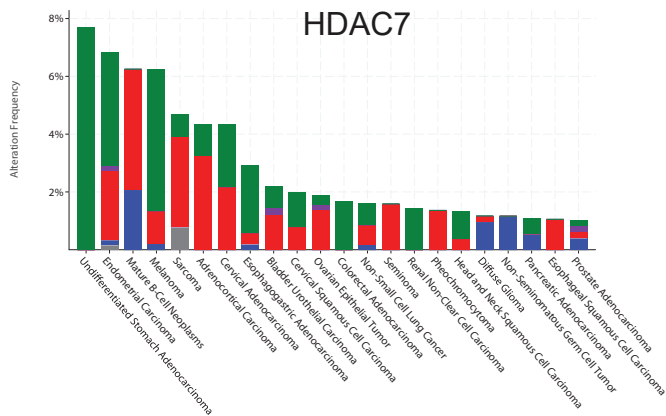

HDAC8

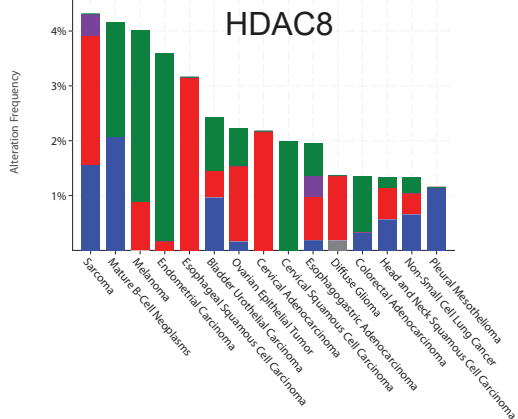

HDAC9

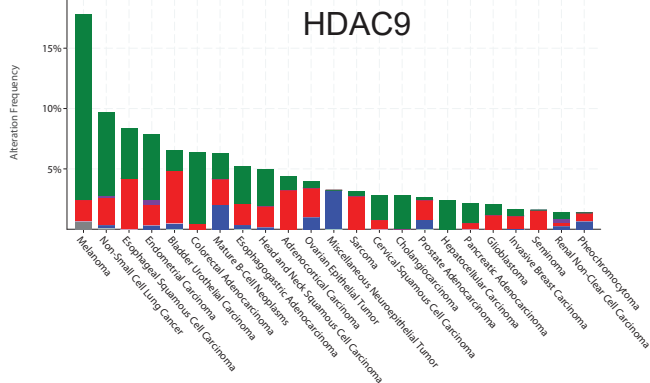

SIRT1

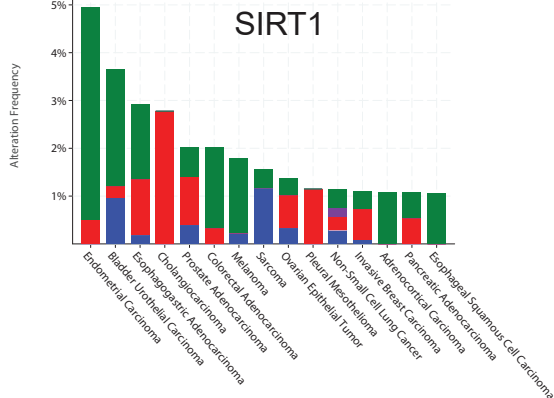

# Deacetylases

SIRT2

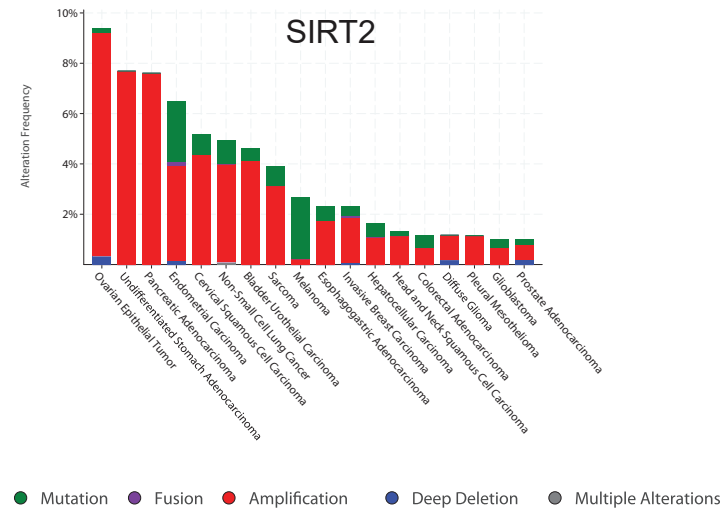

SIRT3

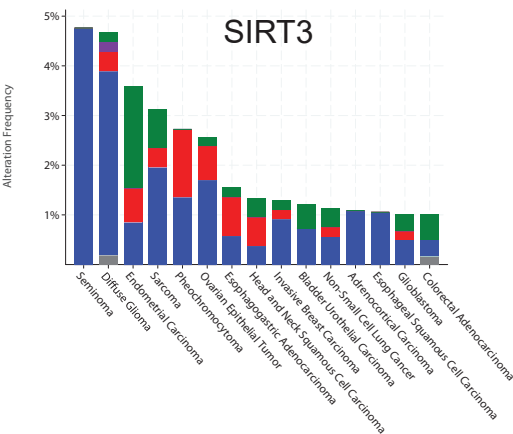

SIRT4

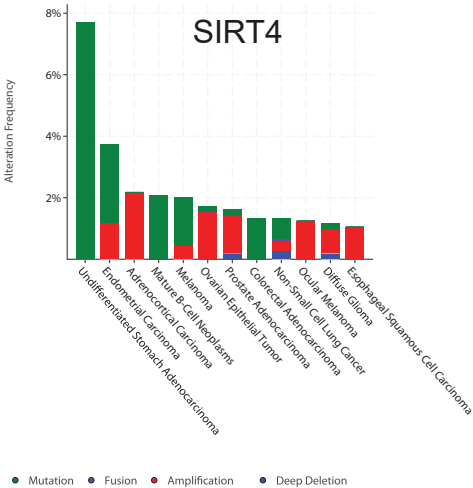

SIRT5

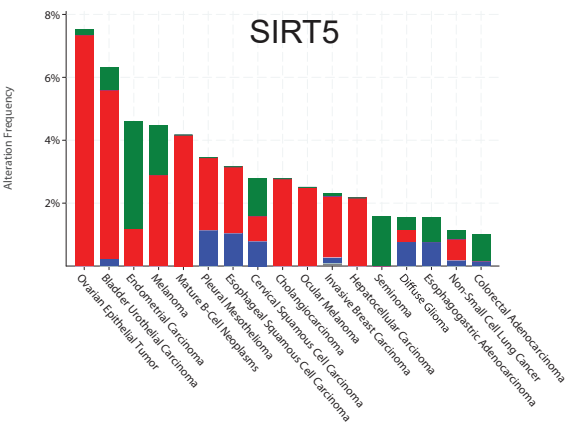

SIRT6

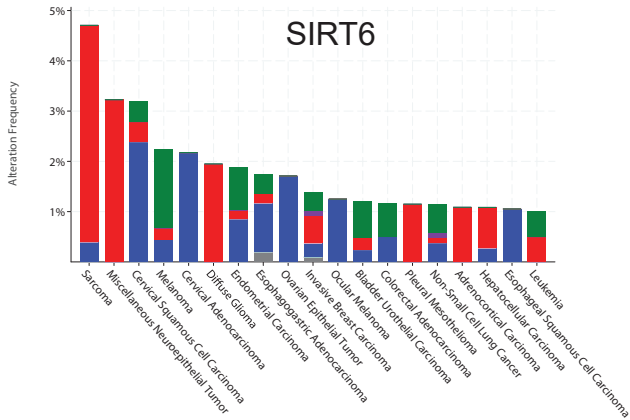

# Methyltransferases

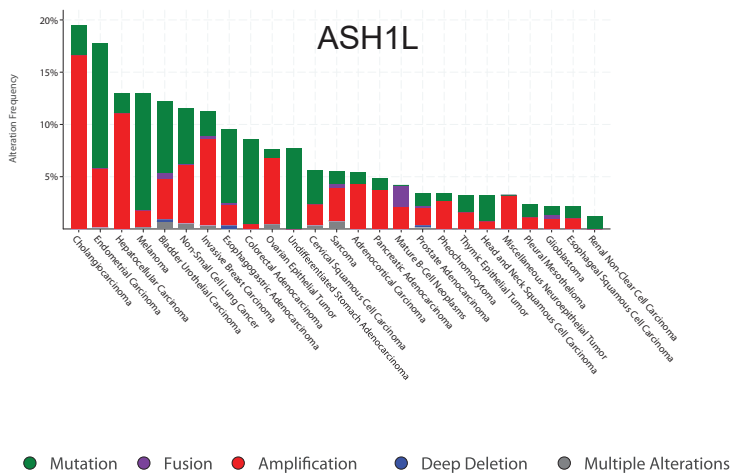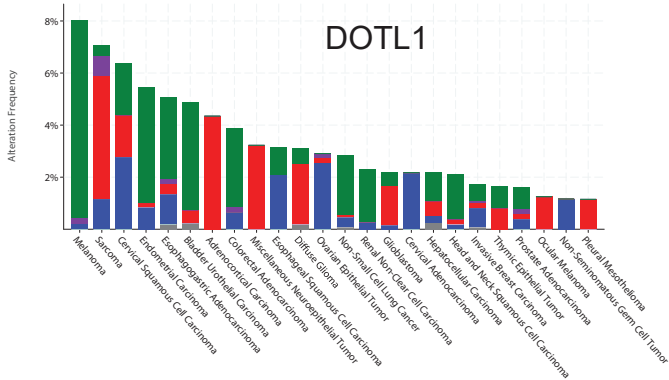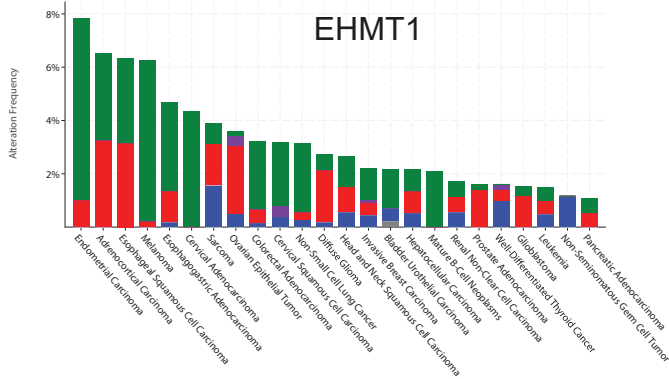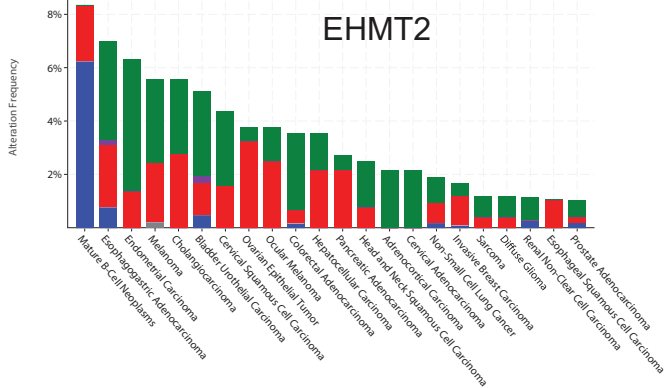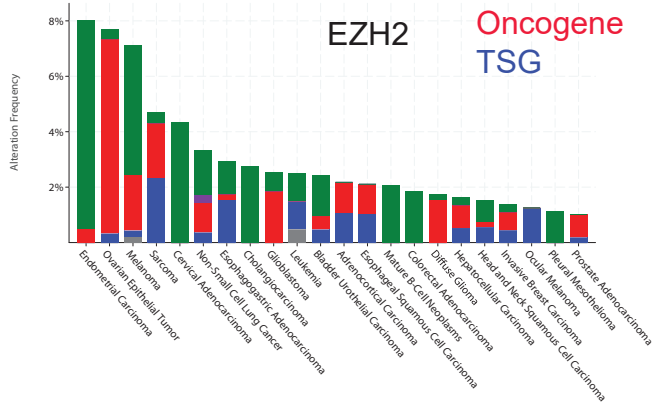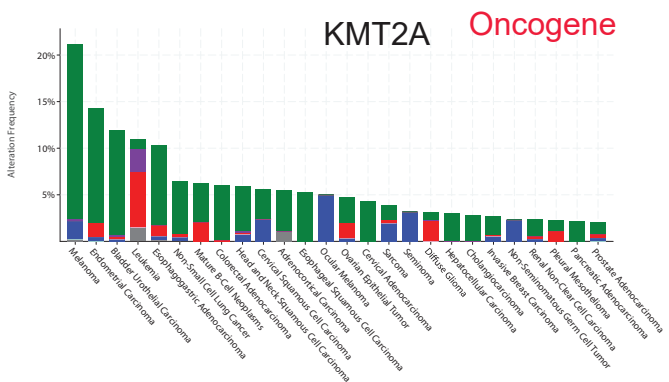

# Methyltransferases

KMT2B

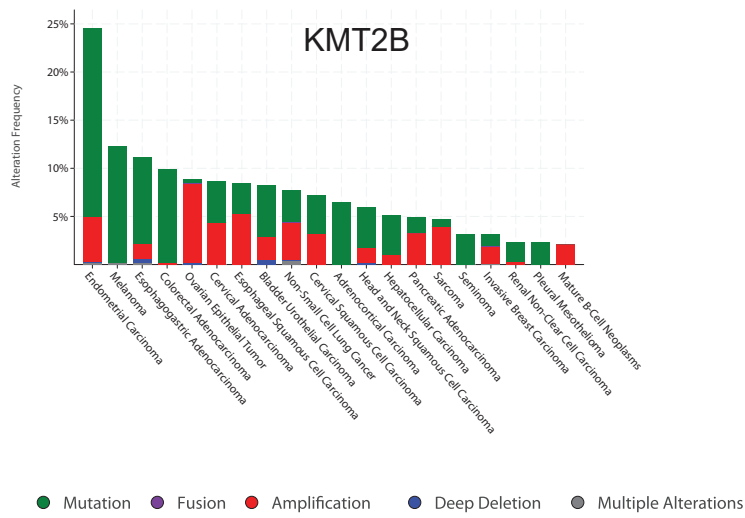

KMT2C

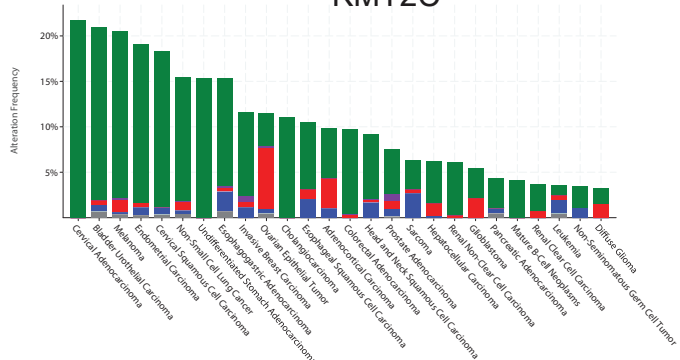

KMT2D

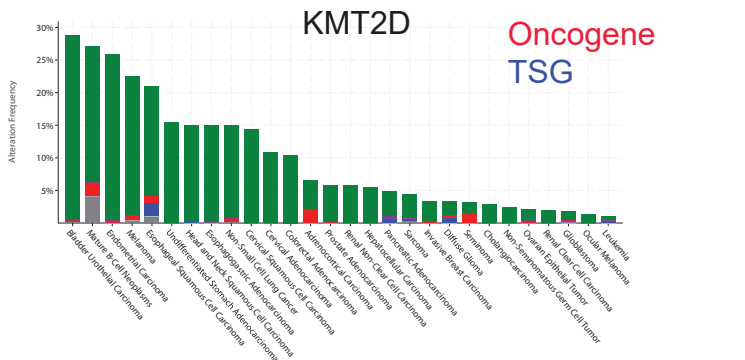

KMT2E

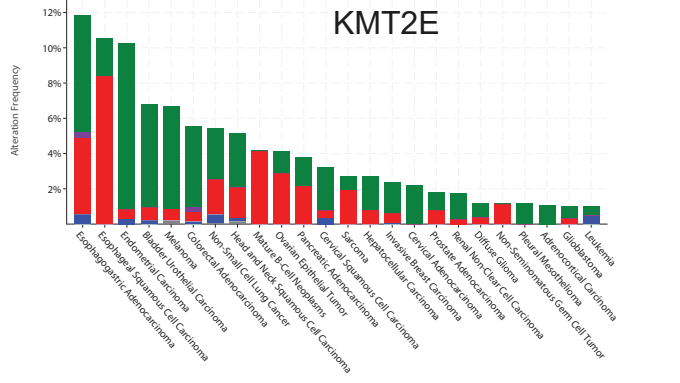

KMT5A

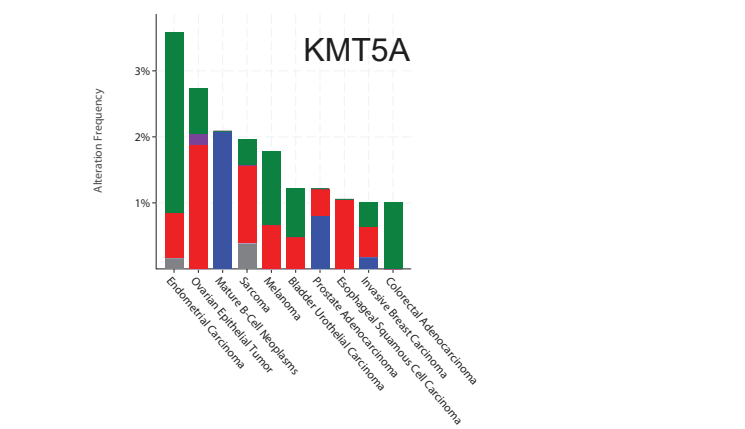

KMT5B

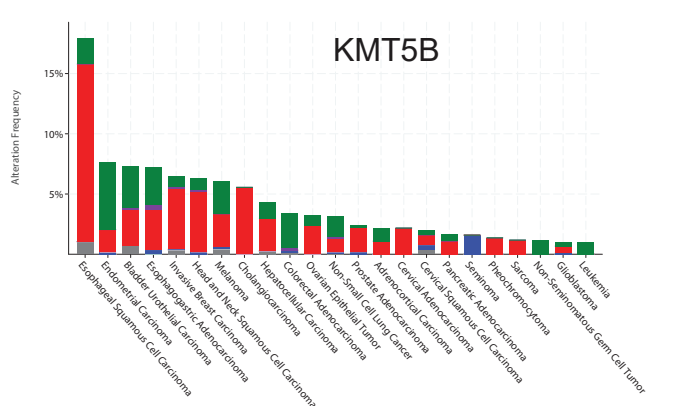



# Methyltransferases

KMT5C

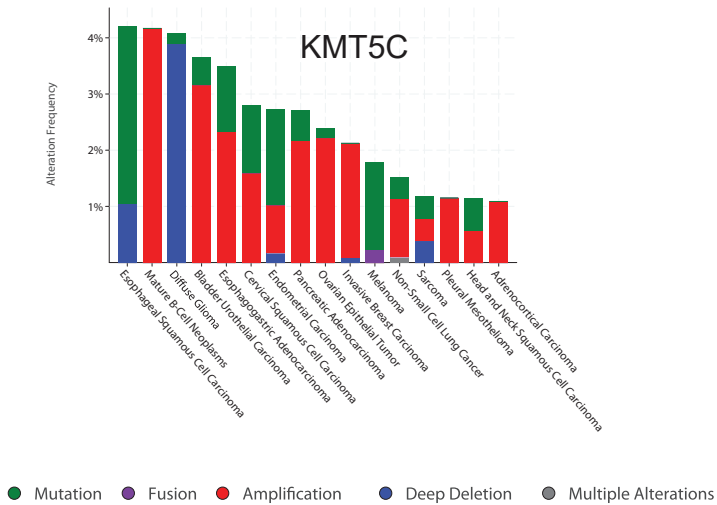

NSD1

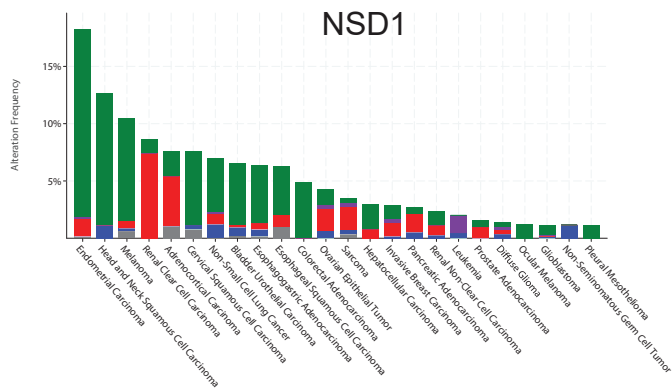

NSD2

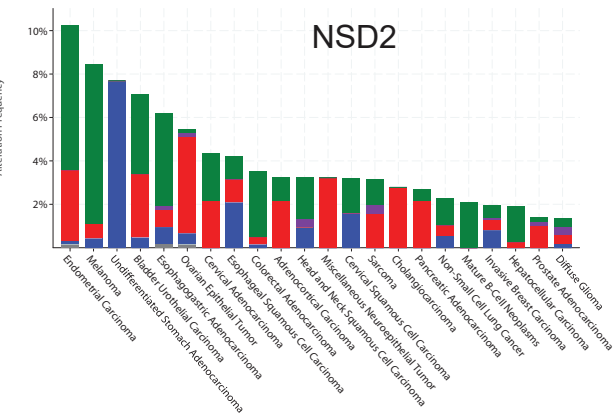

NSD3

Oncogene

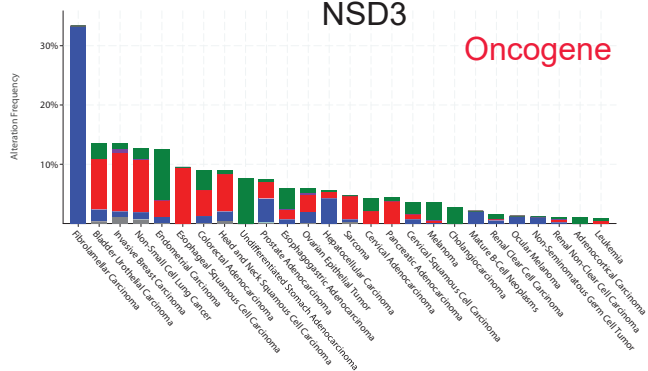

PRMD2

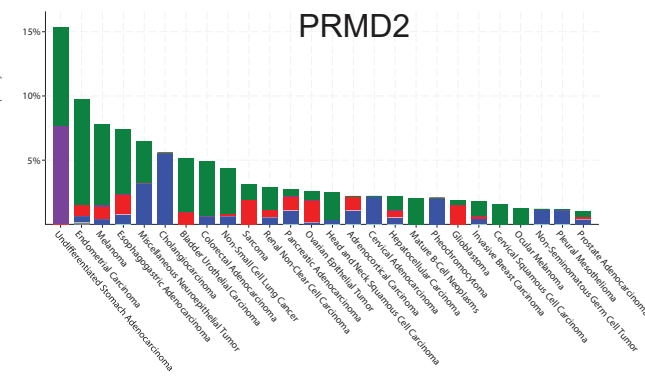

SETD1A

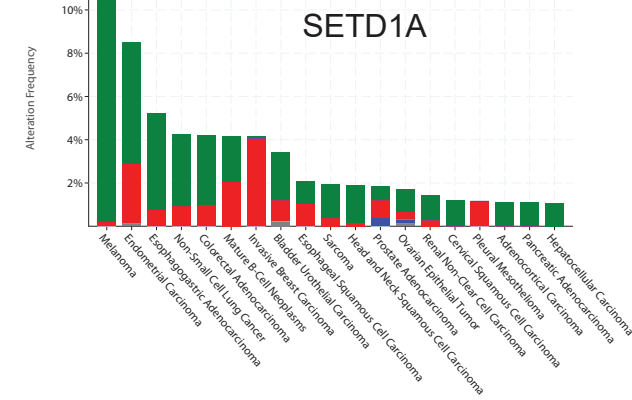

# Methyltransferases

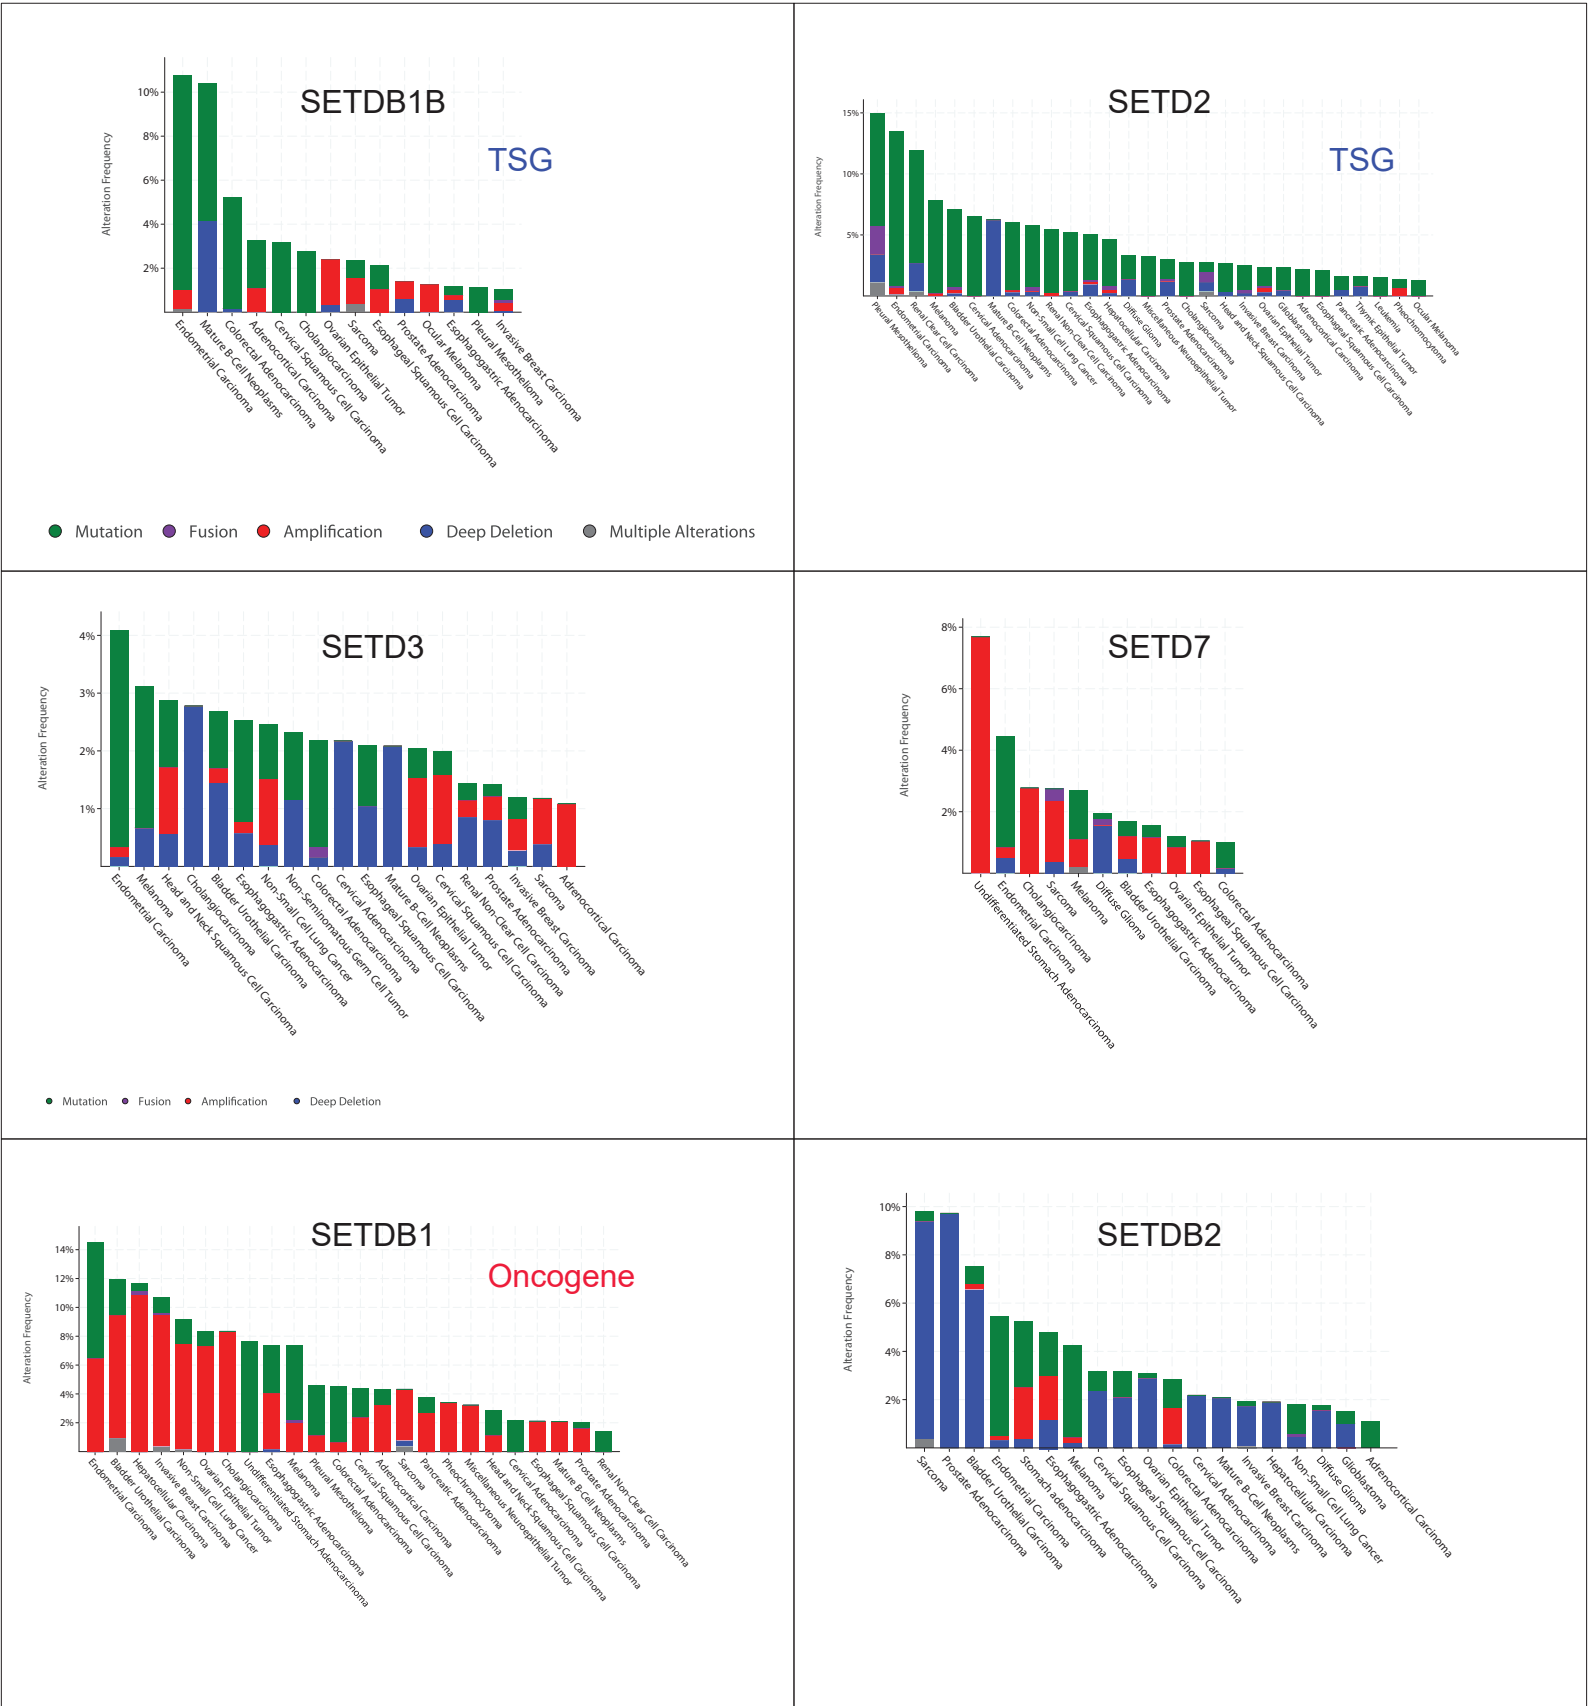

# Methyltransferases

SETMAR

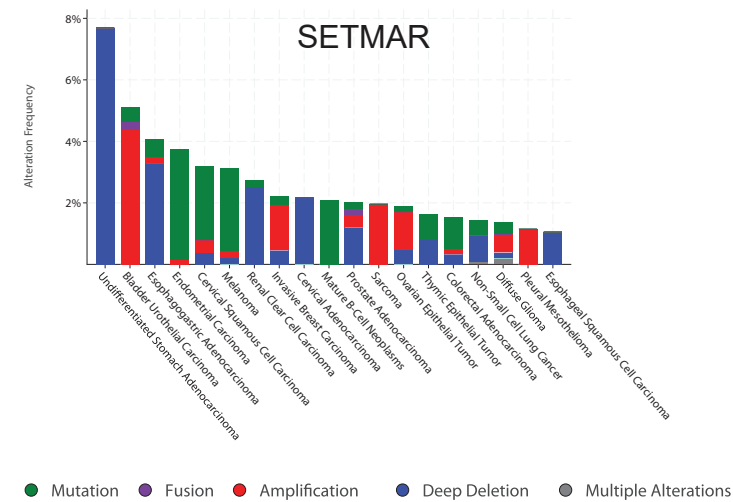

SMYD1

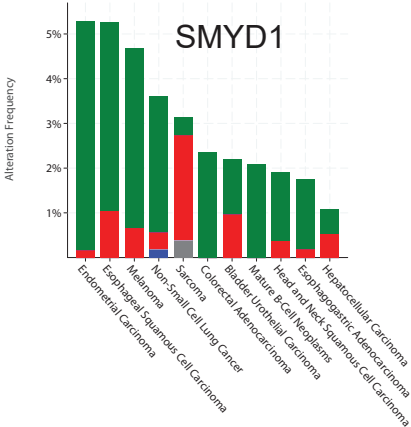

SMYD2

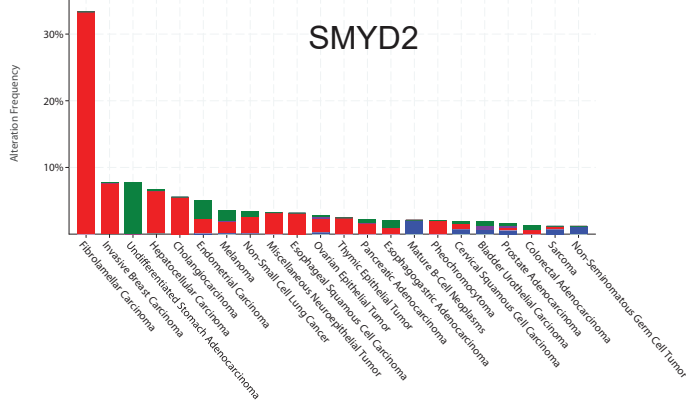

SMYD3

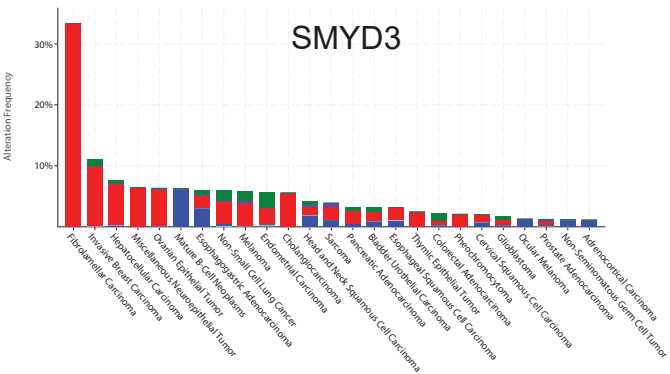

SMYD5

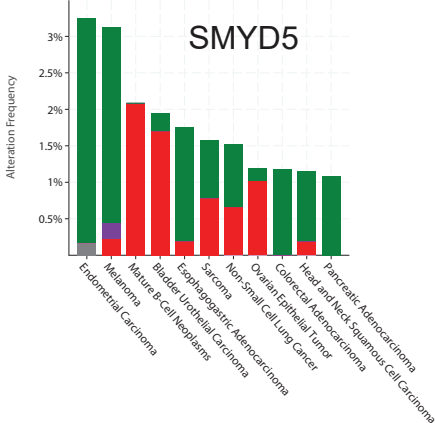

SUV39H1

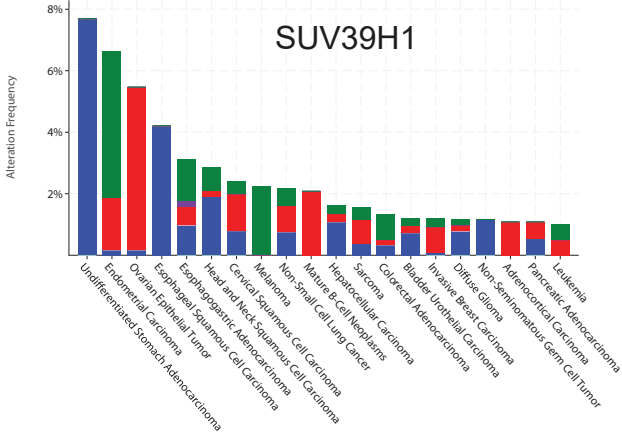

# Methyltransferases

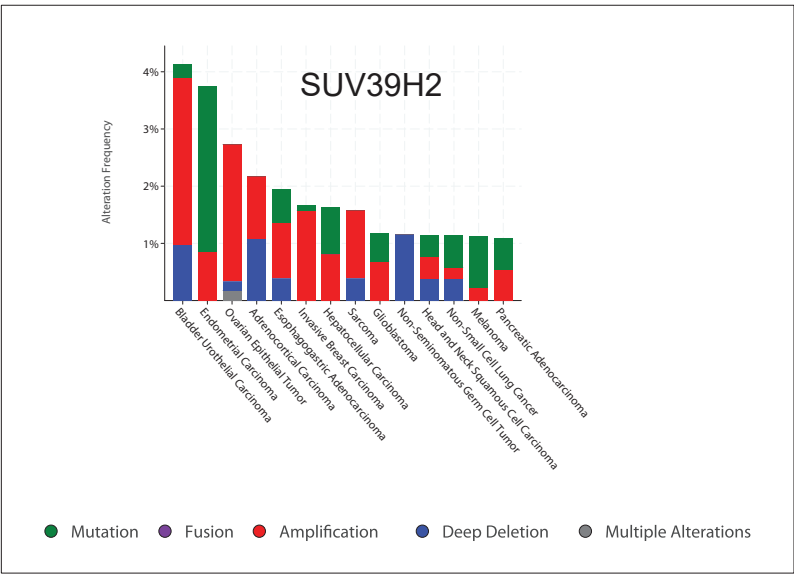

# Demethylases

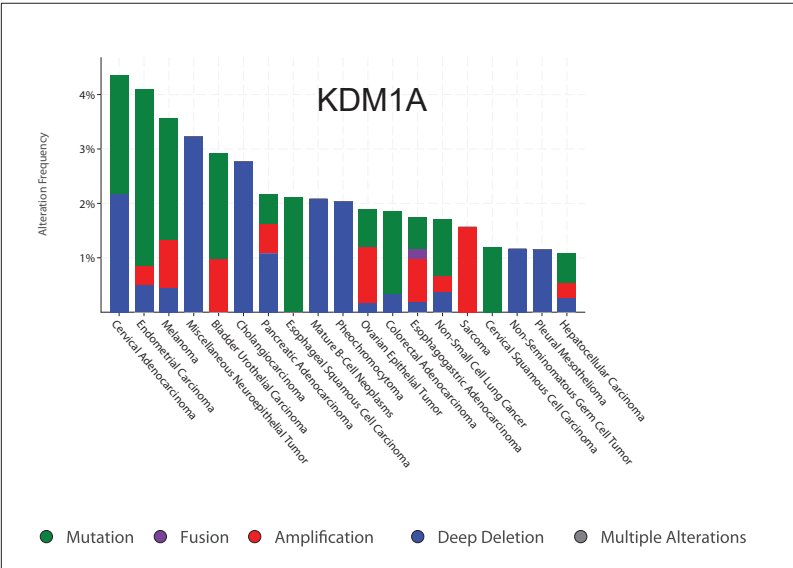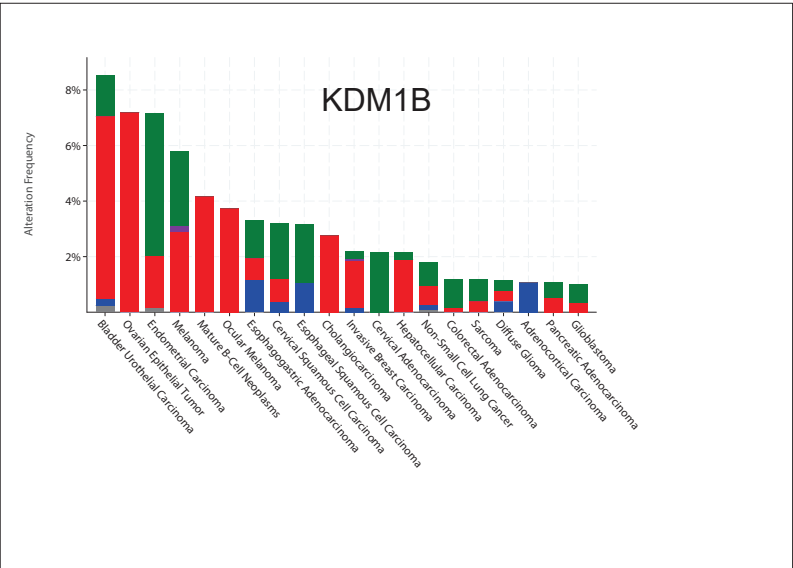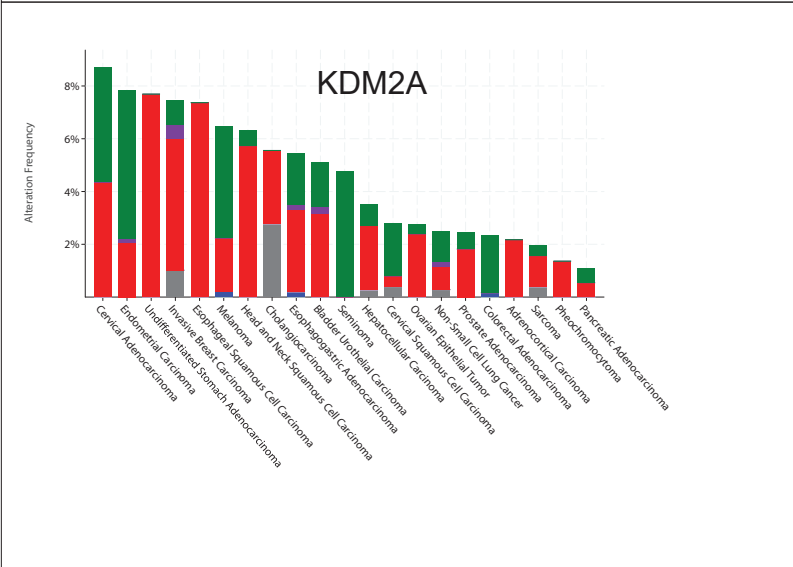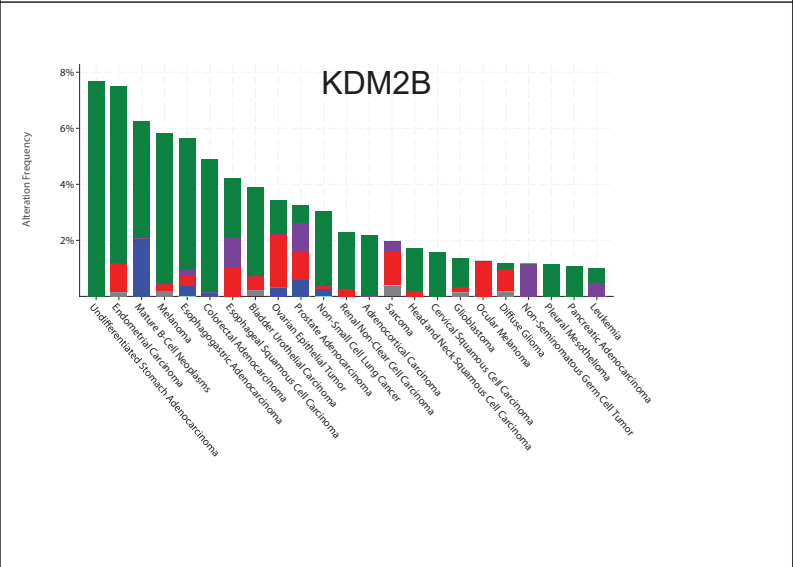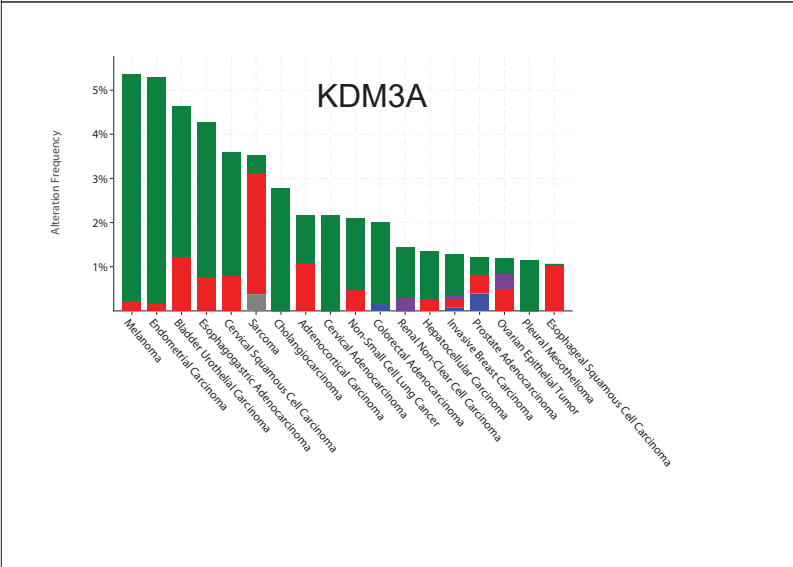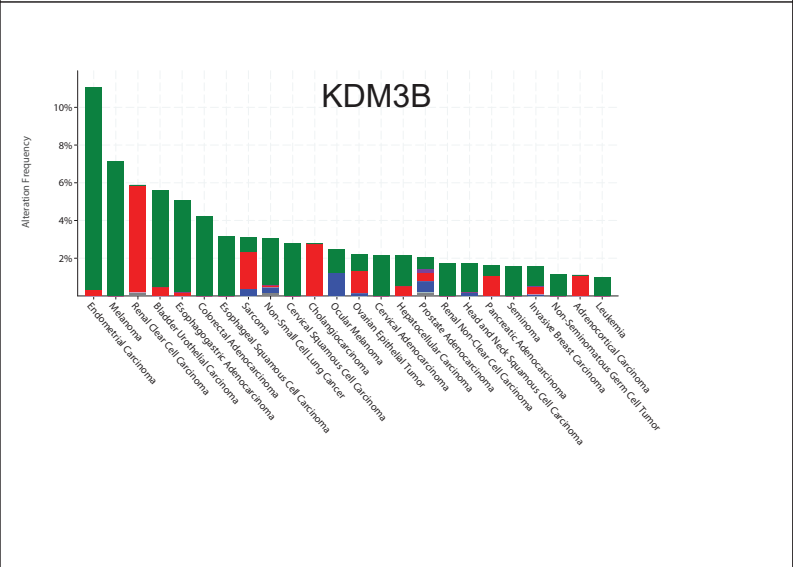

# Demethylases

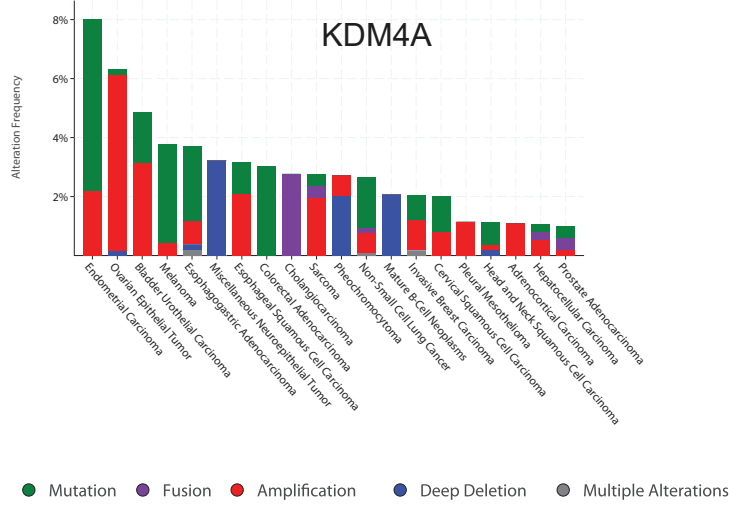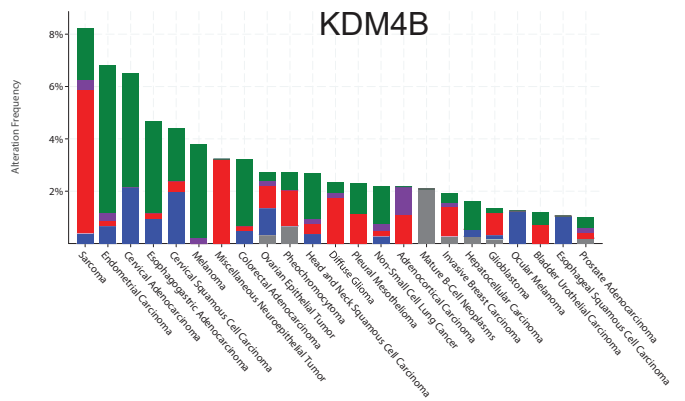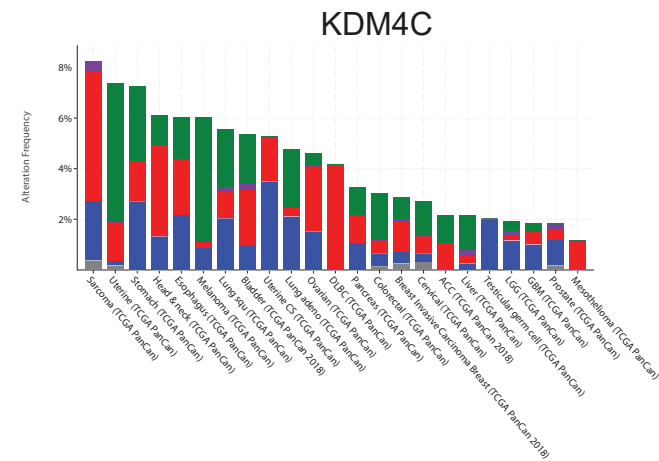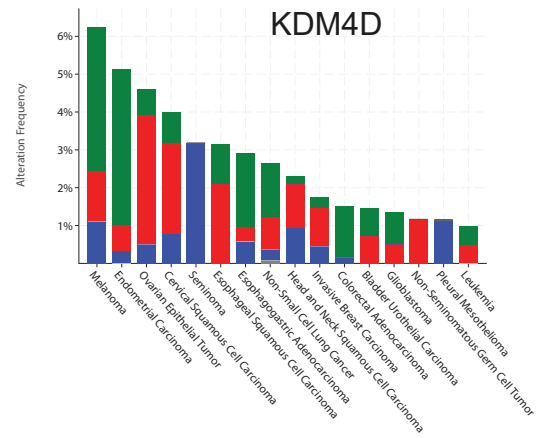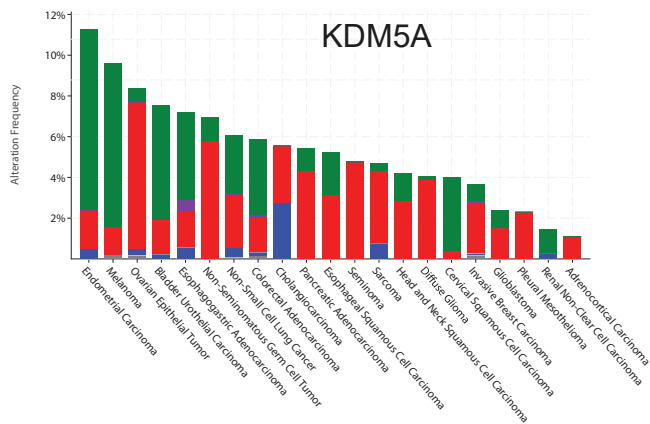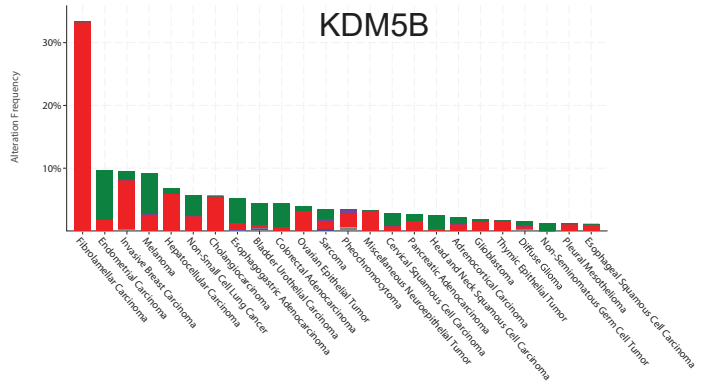

# Demethylases

KDM5C

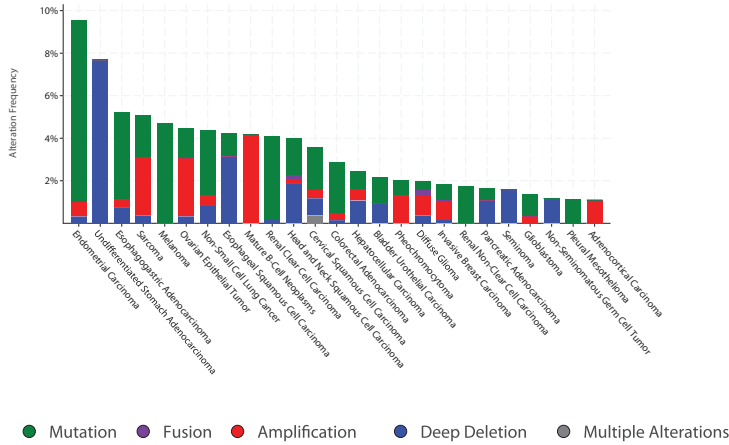

KDM5D

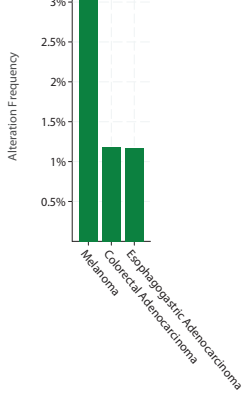

KDM6A

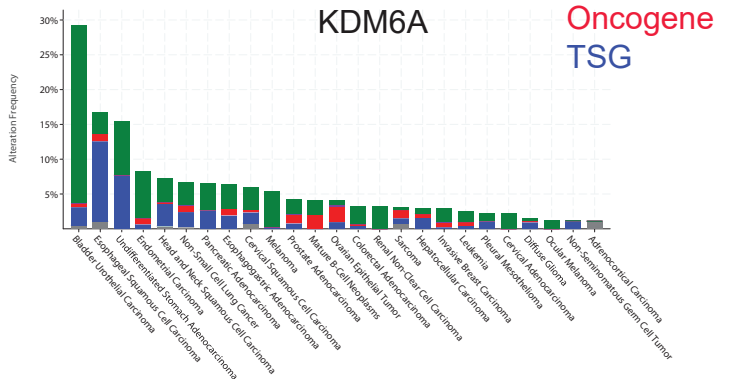

KDM6B

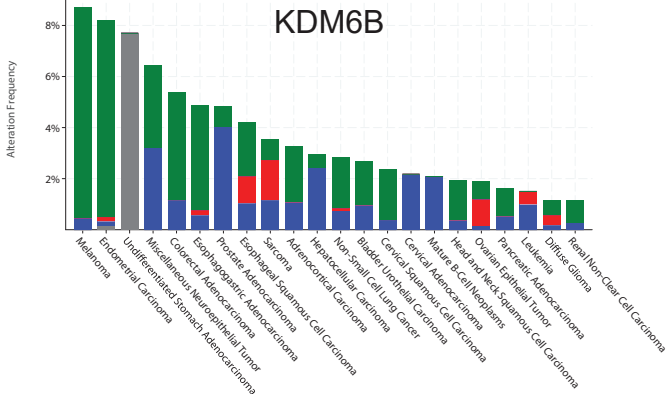

KDM7A

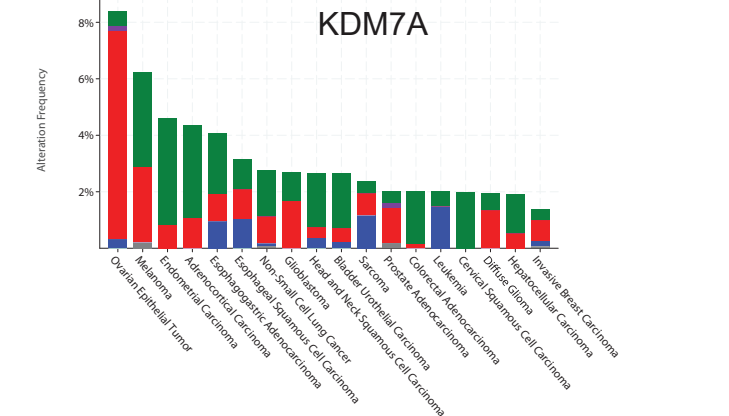

PHF2

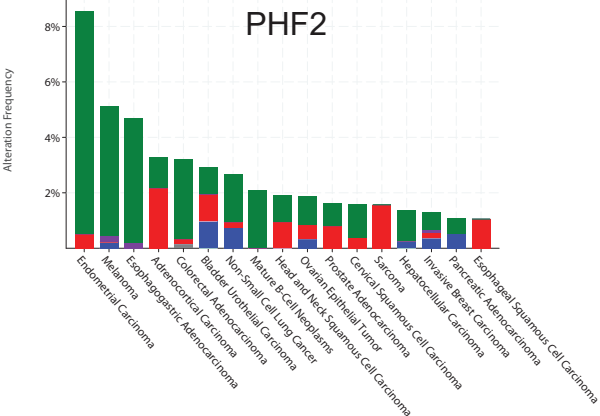

# Demethylases

PHF8

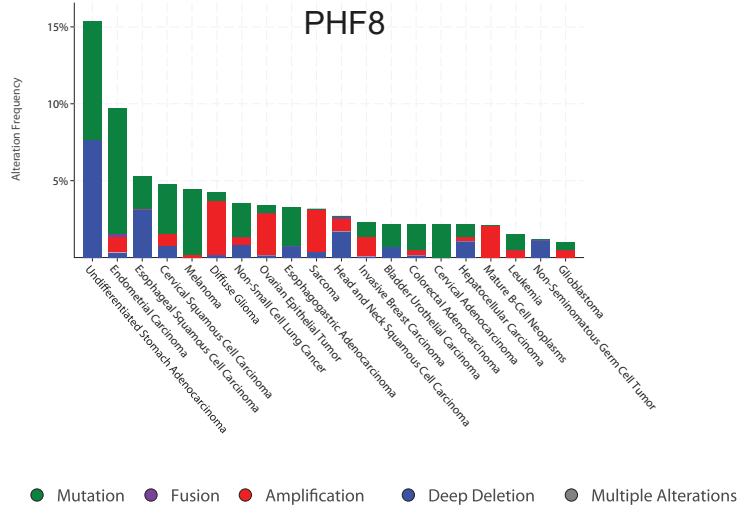

RIOX1

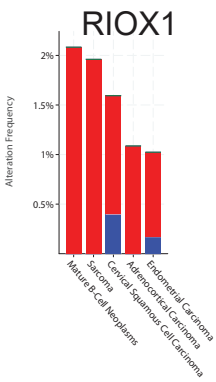

RIOX2

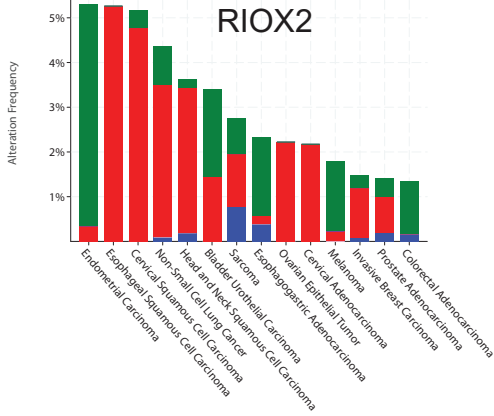

Supplement: s1 [file s1]
